# Supplementary material
Source: Springer Nature journal article supplement (https://www.springermedizin.de/resource/supplementary/12943_2009_444_MOESM3_ESM.pdf/9554276)

**A**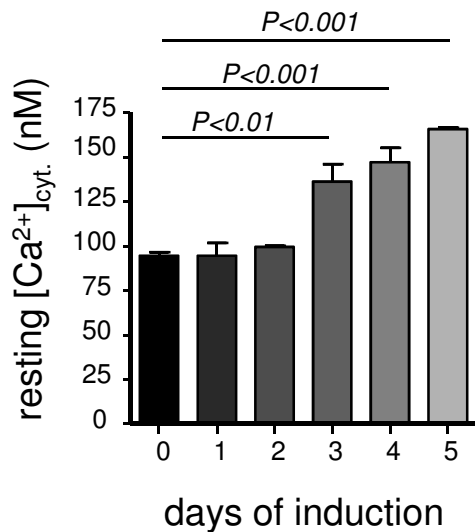**B**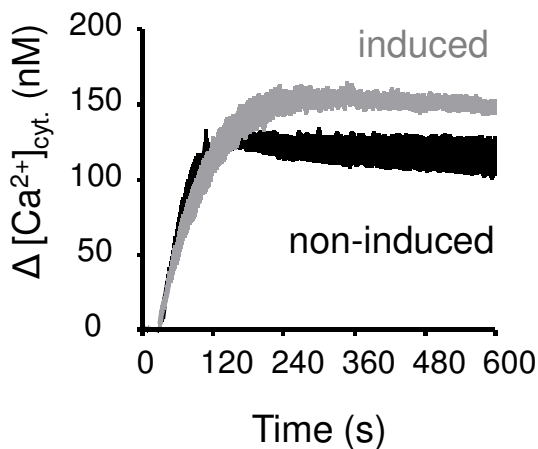**C**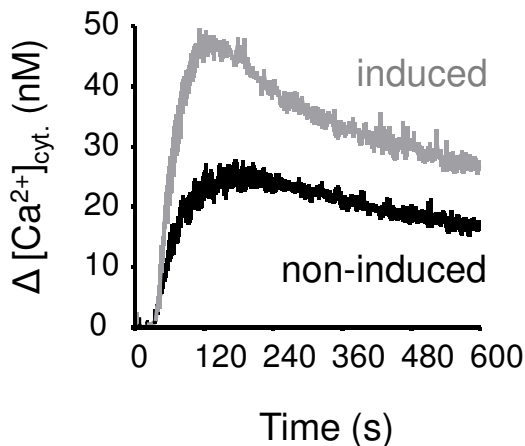**D**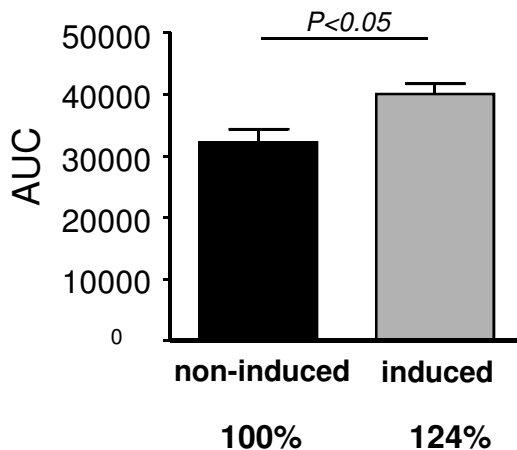

Supplement: MOESM3 [file 9554276]
